# Supplementary figures and images for: The Use of New Waste-Based Plasticizer Made from Modified Used Palm Oil for Non-Glutinous Thermoplastic Starch Foam
Source: MDPI journal article supplement (doi:10.3390/polym14193997), 2022-09-24

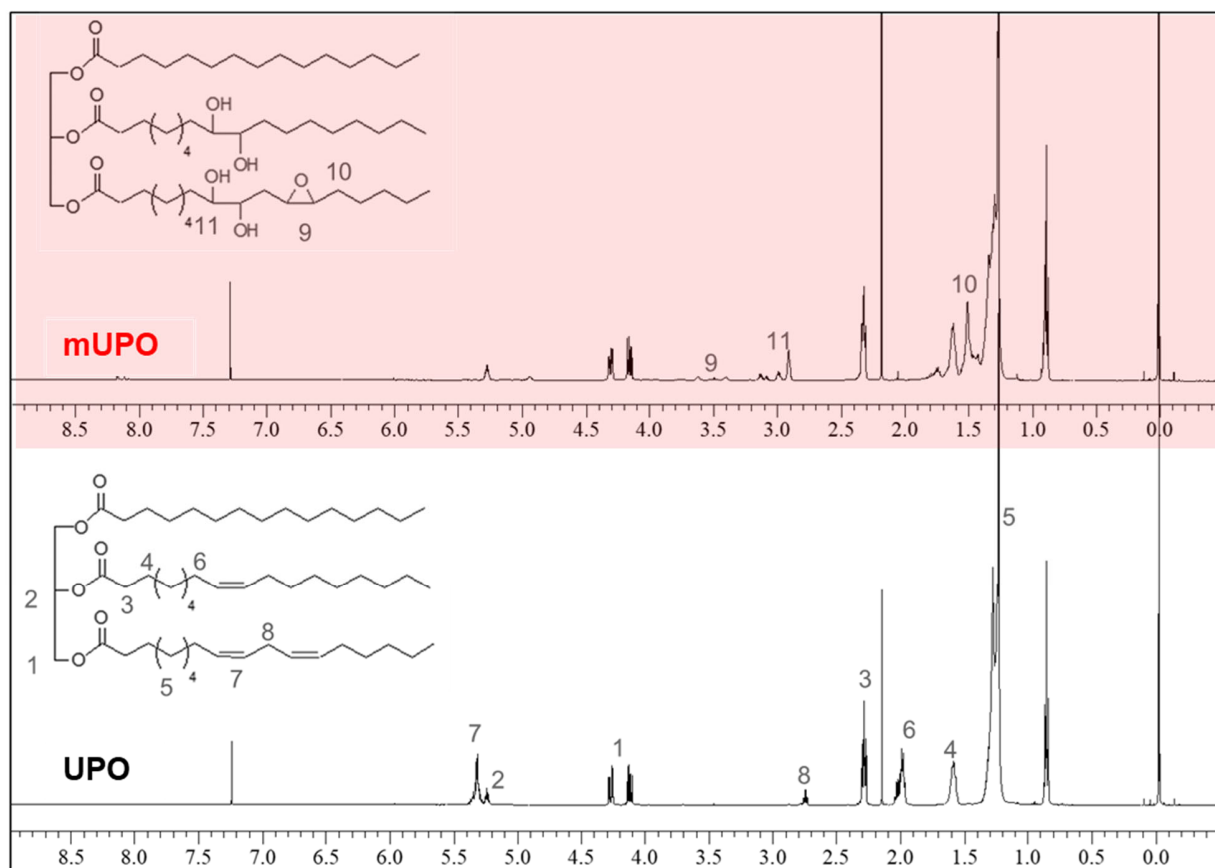

**Figure S1.** <sup>1</sup>H-NMR spectra of UPO and mUPO.

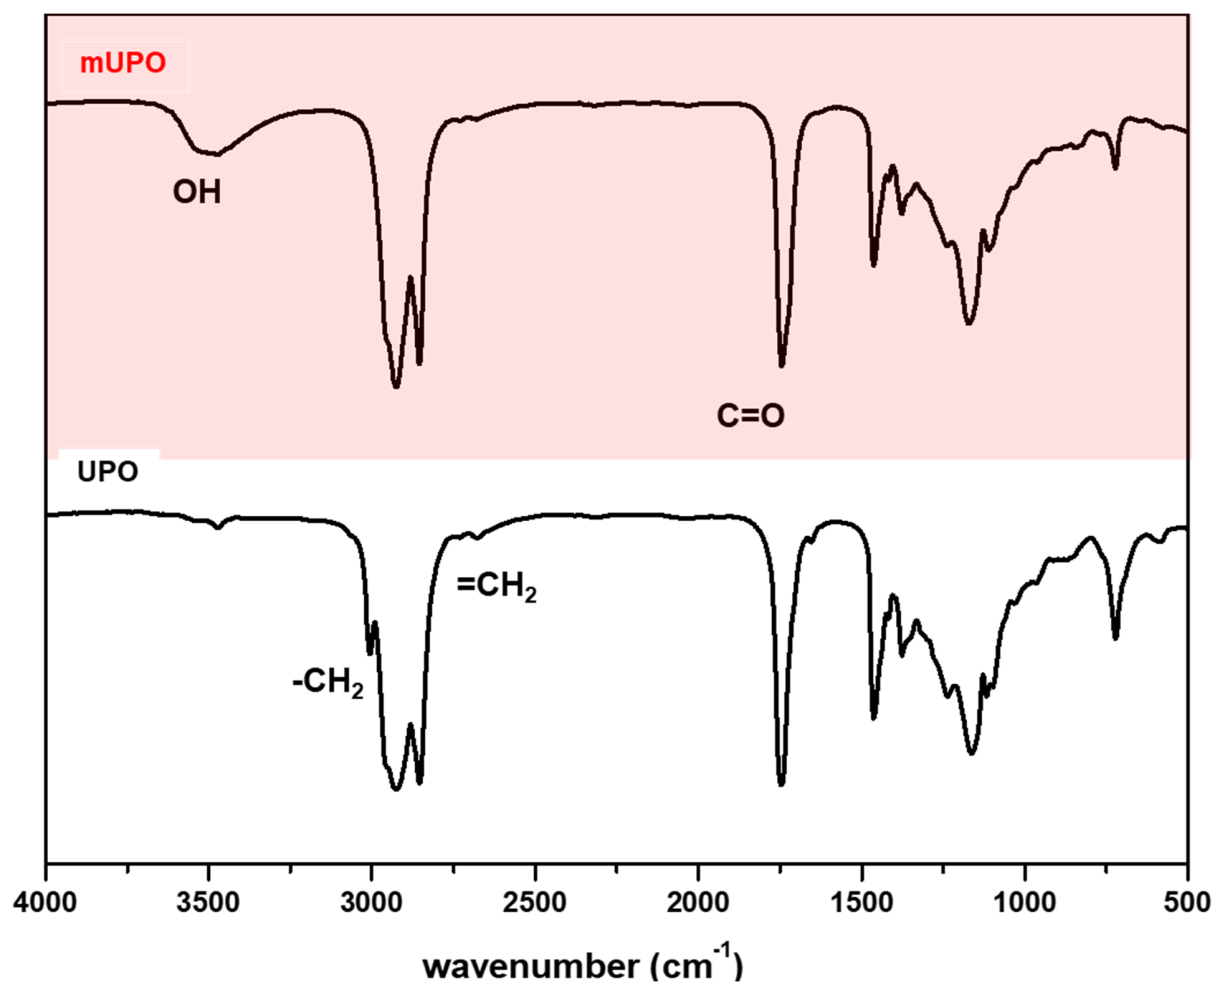

Figure S2. FTIR spectra of UPO and mUPO.

Supplement: s1 [file s1]
